# Supplementary material
Source: PubMed Central journal article supplement (PMC9673009)
Supplement: NIHMS1846760-supplement-SupplementaryTable2-3.pdf [file NIHMS1846760-supplement-SupplementaryTable2-3.pdf]

In the format provided by the authors and unedited.

# A peripheral immune signature of responsiveness to PD-1 blockade in patients with classical Hodgkin lymphoma

Fathima Zumla Cader <sup>1,7,13</sup>, Xihao Hu <sup>2,3,8,13</sup>, Walter L. Goh<sup>4</sup>, Kirsty Wienand<sup>1,9</sup>, Jing Ouyang<sup>1</sup>, Elisa Mandato<sup>1</sup>, Robert Redd <sup>2</sup>, Lee N. Lawton<sup>1</sup>, Pei-Hsuan Chen<sup>5</sup>, Jason L. Weirather <sup>5</sup>, Ron C. J. Schackmann<sup>4,10</sup>, Bo Li <sup>2,3,11</sup>, Wenjiang Ma<sup>1,12</sup>, Philippe Armand <sup>1</sup>, Scott J. Rodig<sup>6</sup>, Donna Neuberg <sup>2</sup>, X. Shirley Liu <sup>2,3,14</sup> ✉ and Margaret A. Shipp <sup>1,14</sup> ✉

---

<sup>1</sup>Department of Medical Oncology, Dana-Farber Cancer Institute, Boston, MA, USA. <sup>2</sup>Department of Data Sciences, Dana-Farber Cancer Institute, Boston, MA, USA. <sup>3</sup>Harvard T.H. Chan School of Public Health, Boston, MA, USA. <sup>4</sup>Department of Cell Biology, Harvard Medical School, Boston, MA, USA. <sup>5</sup>Center for Immuno-Oncology, Dana-Farber Cancer Institute, Boston, MA, USA. <sup>6</sup>Department of Pathology, Brigham and Women's Hospital, Boston, MA, USA. <sup>7</sup>Present address: AstraZeneca, City House, Cambridge, UK. <sup>8</sup>Present address: GV20 Therapeutics LLC, Cambridge, MA, USA. <sup>9</sup>Present address: Department of Hematology and Oncology, Göttingen Comprehensive Cancer Center, Göttingen, Germany. <sup>10</sup>Present address: Merus, Utrecht, the Netherlands. <sup>11</sup>Present address: Lyda Hill Department of Bioinformatics, UT Southwestern Medical Center, Dallas, TX, USA. <sup>12</sup>Present address: Clarion Healthcare, Boston, MA, USA. <sup>13</sup>These authors contributed equally: Fathima Zumla Cader, Xihao Hu. <sup>14</sup>These authors jointly supervised this work: X. Shirley Liu, Margaret A. Shipp. ✉e-mail: [xshliu@ds.dfci.harvard.edu](mailto:xshliu@ds.dfci.harvard.edu); [Margaret\\_Shipp@dfci.harvard.edu](mailto:Margaret_Shipp@dfci.harvard.edu)

**Supplementary Table 2.** Mass cytometry antibodies and reporter isotopes used for CyToF Cader et al<sup>31</sup>. Antibodies from Fluidigm/ DVS sciences were conjugated to the isotopes listed. All other antibodies required custom conjugations with a final 0.2mg/ml concentration.

| Antibody                | Source                      | Cat No.                  | Dilution | Clone     | Isotopes |
|-------------------------|-----------------------------|--------------------------|----------|-----------|----------|
| CD45                    | Fluidigm/ DVS sciences      | 3089003B                 | 1:200    | HI30      | 89Y      |
| PAX5                    | Biologend                   | 649702                   | 1:50     | IH9       | 113Ind   |
| CD14                    | Biologend                   | 301801                   | 1:100    | M5E2      | 115Ind   |
| Eomes                   | eBioscience                 | Custom                   | 1:50     | WD1928    | 141Pr    |
| Ki-67                   | BD Biosciences              | 556003                   | 1:100    | B56       | 142Nd    |
| CD30                    | BD biosciences              | 555827                   | 1:100    | BerH8     | 143Nd    |
| CCR5                    | Fluidigm/ DVS sciences      | 3144007A                 | 1:100    | NP-6G4    | 144Nd    |
| CD4                     | Fluidigm/ DVS sciences      | 3145001B                 | 1:200    | RPA-T4    | 145Nd    |
| CD8a                    | Fluidigm/ DVS sciences      | 3146001B                 | 1:200    | RPA-T8    | 146Nd    |
| cParp                   | BD Biosciences              | 552597                   | 1:100    | F21-852   | 147Sm    |
| HLA-A/B/C (MHC class I) | Biologend                   | 311402                   | 1:400    | W6/32     | 148Nd    |
| CD25                    | Fluidigm/ DVS sciences      | 3149010B                 | 1:200    | 2A3       | 149Sm    |
| CD57                    | Biologend                   | 322325<br>Discontinued   | 1:100    | HCD57     | 150Nd    |
| Tim3                    | BD biosciences              | Custom                   | 1:25     | 7D3       | 151Eu    |
| PD-L2                   | Courtesy of G.Freeman, DFCI | N/A                      |          | 24F.10C12 | 152Sm    |
| pSTAT1                  | Fluidigm/ DVS sciences      | 3153005A                 | 1:100    | 4a        | 153Eu    |
| CD163                   | Fluidigm/ DVS sciences      | 3154007B                 | 1:100    | GHI/61    | 154Sm    |
| PD-1                    | Courtesy of G.Freeman, DFCI | N/A                      | 1:50     | EH12.2H7  | 155Gd    |
| B2M                     | Biologend                   | 316302                   | 1:400    | 2M2       | 156Gd    |
| CCR4                    | Fluidigm/ DVS sciences      | 3158006B<br>Discontinued | 1:100    | 205410    | 158Gd    |
| CCR7                    | Fluidigm/ DVS sciences      | 3159003A                 | 1:100    | G043H7    | 159Tb    |
| T-bet                   | Fluidigm/ DVS sciences      | 3160010B                 | 1:100    | 4B10      | 160Gd    |
| PD-L1                   | Courtesy of G.Freeman, DFCI | N/A                      | 1:50     | 29E.2A3   | 161Dy    |
| FoxP3                   | Fluidigm/ DVS sciences      | 3162011A                 | 1:100    | PCH101    | 162Dy    |
| CXCR5                   | R&D                         | MAB190                   | 1:100    | 51505     | 163Dy    |
| CD161                   | Fluidigm/ DVS sciences      | 3164069B                 | 1:100    | HP-3G10   | 164Dy    |
| CD45RO                  | Fluidigm/ DVS sciences      | 3165011B                 | 1:200    | UCHL1     | 165Ho    |

|                             |                             |          |       |          |       |
|-----------------------------|-----------------------------|----------|-------|----------|-------|
| Lag3                        | R&D                         | MAB23193 | 1:50  | 874501   | 166Er |
| Granzyme B                  | Harvard Medical School      | N/A      | 1:200 | GB11     | 167Er |
| CD73                        | Fluidigm/ DVS sciences      | 3168015B | 1:100 | AD2      | 168Er |
| CD33                        | Fluidigm/ DVS sciences      | 3169010B | 1:100 | WM53     | 169Tm |
| CD3                         | Fluidigm/ DVS sciences      | 3170001B | 1:200 | UCH T 1  | 170Er |
| CD68                        | Fluidigm/ DVS sciences      | 3171011B | 1:100 | Y1/82a   | 171Yb |
| phosphoS6                   | Cell Signaling Technologies | Custom   | 1:200 | D57.2.2E | 172Yb |
| IRF4                        | Biolegend                   | 646402   | 1:100 | IRF4.3E4 | 173Yb |
| HLA-DR/DP/DQ (MHC class II) | Biolegend                   | 361702   | 1:400 | Tu39     | 174Yb |
| CD15                        | Biolegend                   | 301902   | 1:100 | HI98     | 175Lu |
| CD56                        | BD Biosciences              | 555514   | 1:100 | B159     | 176Yb |
| CD16                        | Fluidigm/ DVS sciences      | 3209004B | 1:100 | 3G8      | 209Bi |

**Supplementary Table 3.** The target antigens, antibody clones, and dilutions used in Multiplex Immunofluorescence.

| Antigen | Antibody dilution | Clone   | Ref#   | Lot#     | Manufacturer   | Opal Fluorochrome |
|---------|-------------------|---------|--------|----------|----------------|-------------------|
| CD3     | 1:750             | Poly    | A0452  | 20068607 | Dako           | 650               |
| CD4     | 1:250             | 4B12    | M7310  | 20061090 | Dako           | 520               |
| CD68    | 1:2000            | PGM1    | M0876  | 20024189 | Dako           | 620               |
| PAX5    | 1:100             | 24/PAX5 | 610863 | 9017823  | BD Biosciences | 570               |
| GZMB    | 1:100             | Grb-7   | M7235  | 20036875 | Dako           | 540               |
